# Supplementary material for: Double reactive oxygen species system photoinduced by Cu8 NCs: synergistic catalysis of phenylacetylene self-coupling reaction
Source: Royal Society of Chemistry journal article supplement (doi:10.1039/d4nr04754k), 2024-12-26
Supplement: d4nr04754k1.pdf [file d4nr04754k1.pdf]

## Supporting information

### Double reactive oxygen species system photoinduced by Cu<sub>8</sub> NCs: synergistic catalysis of phenylacetylene self-coupling reaction

Tingyu Guo,<sup>a</sup> Yapei Yun,<sup>a,\*</sup> Tianrong Li,<sup>a</sup> Jun Xia,<sup>a</sup> Jinyan Zhou,<sup>a</sup> Hongting Sheng,<sup>a,\*</sup> Manzhou Zhu<sup>a,\*</sup>

School of Chemistry & Chemical Engineering, School of Materials Science and Engineering and Anhui Province Key Laboratory of Chemistry for Inorganic/Organic Hybrid Functionalized Materials, Department of Chemistry and Center for Atomic Engineering of Materials, Key Laboratory of Structure and Functional Regulation of Hybrid Materials of the Ministry of Education, Anhui University; Hefei, 230601, China

|                                                                                                       |    |
|-------------------------------------------------------------------------------------------------------|----|
| Materials and Equipment                                                                               | S1 |
| Experimental section                                                                                  | S1 |
| Figure S1-S18. Characterizations of the samples.                                                      | S3 |
| Table S1. Effect of different catalysts on the activity of photocatalytic phenylene coupling reaction | S9 |
| Reference                                                                                             | S9 |

#### Materials and Equipment.

Tetraacetonitrile copper hexafluorophosphate (Cu(CH<sub>3</sub>CN)<sub>4</sub>PF<sub>6</sub>), cuprous oxide (Cu<sub>2</sub>O), carbon disulfide (CS<sub>2</sub>), phenylacetylene (C<sub>8</sub>H<sub>6</sub>), potassium carbonate (K<sub>2</sub>CO<sub>3</sub>), dichloromethane (CH<sub>2</sub>Cl<sub>2</sub>), chloroform (CHCl<sub>3</sub>), sodium borohydride (NaBH<sub>4</sub>), methanol (CH<sub>3</sub>OH), n-hexane (C<sub>6</sub>H<sub>14</sub>), anhydrous ether (C<sub>4</sub>H<sub>10</sub>O)

The X-ray photoelectron spectroscopy (XPS) measurements were conducted on ESCALAB 250Xi. Fourier transform infrared (FT-IR) spectra were recorded with Bruker Tensor 27 instrument. UV-vis. spectra were recorded on a Techcomp UV1000 spectrophotometer. The electron paramagnetic resonance (EPR) spectrum was detected by a Bruker ESP-300E spectrometer at 9.8 GHz, X-band, with 100 Hz field modulation. Gas chromatographic (GC) analysis was carried out on an Shimadzu 2010 plus instrument equipped with a flame ionization detector (FID) using high pure N<sub>2</sub> as the carrier gas.

#### Experimental section

##### 1. Synthesis of the 'BuSCu

ultrasonically disperse 0.5g of cuprous oxide with 60ml of acetonitrile, and slowly add 1ml of ammonia and 1ml of tert-butyl mercaptan to the solution, the solution slowly turns from brick red to grass green, continue to stir for 3-5min, centrifuge, take the clarification solution, and continue to stir for 3h. Centrifuge to obtain a bright yellow precipitate and wash twice with ethanol

##### 2. Synthesis of the Cu<sub>8</sub>-1

0.28g of copper tetraacetonitrile hexafluorophosphate was added to 30ml of acetonitrile ultrasonically dissolved, 0.12g L<sub>1</sub> was dissolved in 30ml of methanol, the L<sub>1</sub> solution was added to the solution of copper tetraacetonitrile hexafluorophosphate, 0.06g sodium borohydride was added after 30min, and the bulk crystals were obtained by diffusion with n-hexane.

### 3. Synthesis of the Cu<sub>8</sub>-2

0.07g of tert-butyl copper sulfide was dissolved in 30ml of chloroform, and 0.07g of L<sub>1</sub> was dissolved in 30ml of methanol, after which it was added to tert-butyl mercaptan and continued to stir for 10 min. The reaction will be volatilized at room temperature in the dark overnight, and dark red block crystals can be obtained after three days.

### 4. Synthesis of the Cu<sub>8</sub>-3

Sonically dissolve 0.07g of copper tert-butyl sulfate in 30ml of chloroform, and 0.07g of L<sub>2</sub> in 30 ml of methanol, then add the solution of copper tert-butyl sulfide and continue to stir for 10min. The reaction solution is volatilized at room temperature, and yellow striped crystals can be obtained after three days.

### 5. Synthesis of the L<sub>1</sub>

Dissolve 1g of carbazole in 10ml of tetrahydrofuran at 0 °C, dissolve 0.7g of potassium tert-butoxide in 5ml of tetrahydrofuran, slowly add potassium tert-butoxide to carbazole tetrahydrofuran solution under stirring, 30 minutes later, add 0.5ml of carbon disulfide dropwise to the reaction system, the system changes from gray-green to bright yellow, and continue to stir at 0 °C for 1h. At the end of the reaction, the solids are washed three times by anhydrous ether.

### 6. The typical process of phenylene oxidative coupling catalyzed by nanoclusters.

In a 15 mL Shrek reaction tube, phenylacetylene (0.5 mmol), Nanocluster (2 mg) and carbinol (1 mL) was then added and the mixture was magnetically stirred and irradiated by visible-light irradiation (10 W blue LEDs,  $\lambda = 400\text{-}500\text{ nm}$ , 10 W  $\times$  10, Xi 'an Watecs Experimental Equipment Co., LTD., China) and simultaneously stirred at 500 rpm at room temperature under 1 atm O<sub>2</sub> (balloon) in a Watecs Parallel Photocatalytic Reactor (WP-TEC-1020HSL, Figure S18). The reaction liquid was concentrated by rotary evaporator and the catalytic reactant was extracted by methanol. The catalytic yield was measured by Shimadzu GC Plus 2010. The remaining solid clusters were washed three times with methanol and were ready for further use.

### 7. Electron Paramagnetic Resonance (EPR).

The signals of free radicals were obtained on electron paramagnetic resonance (EPR) spectrometer (Bruker EMXplus) using the 5,5-dimethyl-1-pyrroline N-oxide (DMPO) and 2,2,6,6-tetramethylpiperidine (TEMP) as the trapping agent. Specifically, for the test of O<sup>•</sup>—, 2 mg catalysts were dispersed in DMPO/methanol solution. The signals were collected under dark and light irradiation ( $\lambda > 400\text{ nm}$ ). For the test of •OH, 2 mg catalysts were dispersed in DMPO/H<sub>2</sub>O solution. For the test of <sup>1</sup>O<sub>2</sub>, 2 mg catalysts were dispersed in TEMP/H<sub>2</sub>O solution.

### 8. Calculation of active oxygen utilization

Under the same conditions, the signal of reactive oxygen species was measured by EPR to ensure that the quality of the three clusters added was the same, and the signal of reactive oxygen species after light was recorded, and then the amount of phenylacetylene of the same substance was added to record the signal of reactive oxygen species after the addition of phenylacetylene. By calculating the difference between the two signals, it is regarded as the signal change caused by the interaction of phenylacetylene with clusters, and the reduced value is divided by the initial value to obtain the utilization rate.

Figure and table

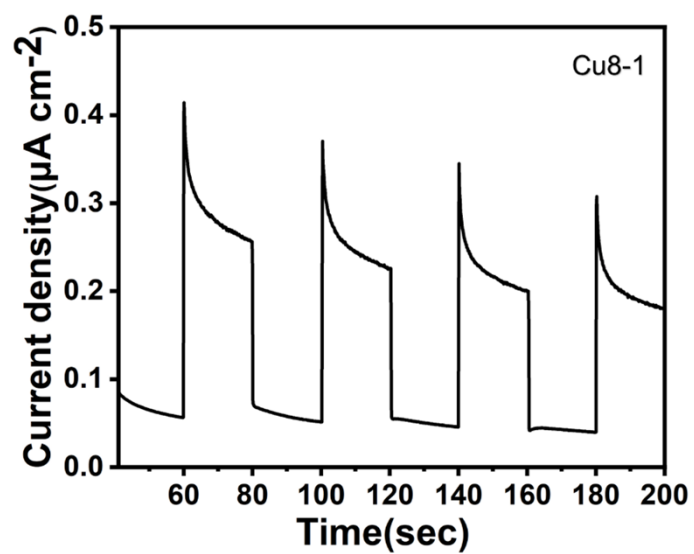

Figure S1: Transient photocurrent density curves of Cu<sub>8</sub>-1

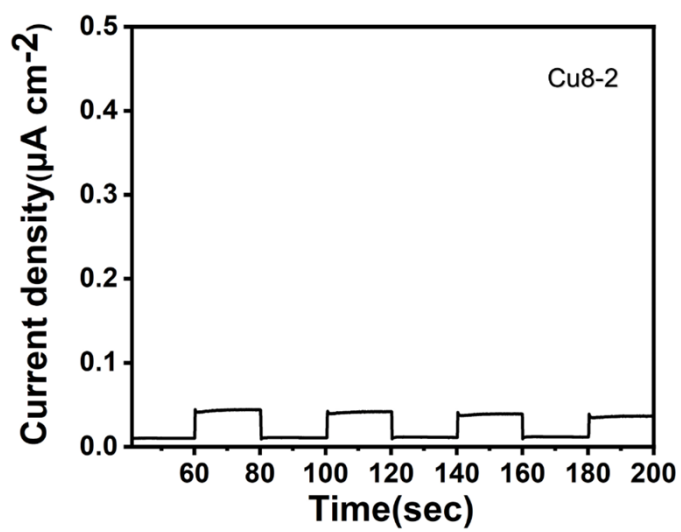

Figure S2: Transient photocurrent density curves of Cu<sub>8</sub>-2

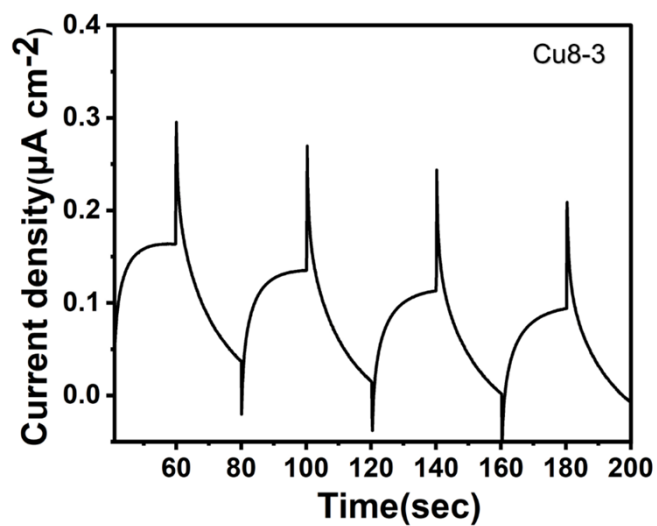

Figure S3: Transient photocurrent density curves of Cu<sub>8</sub>-3

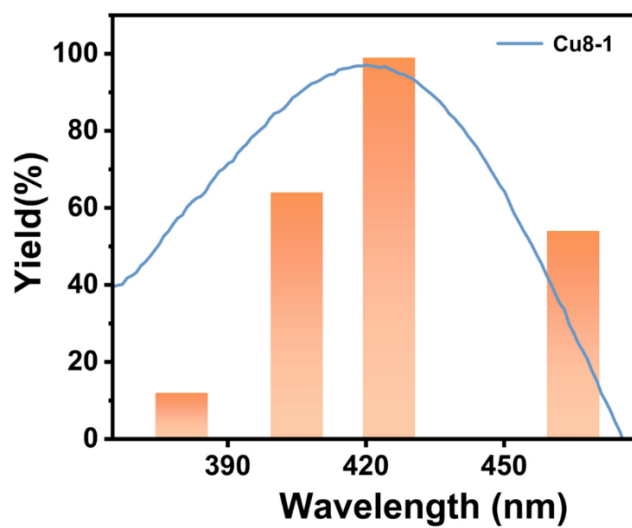

Figure S4: Yield curves of Cu<sub>8</sub>-1 catalyst at different wavelengths

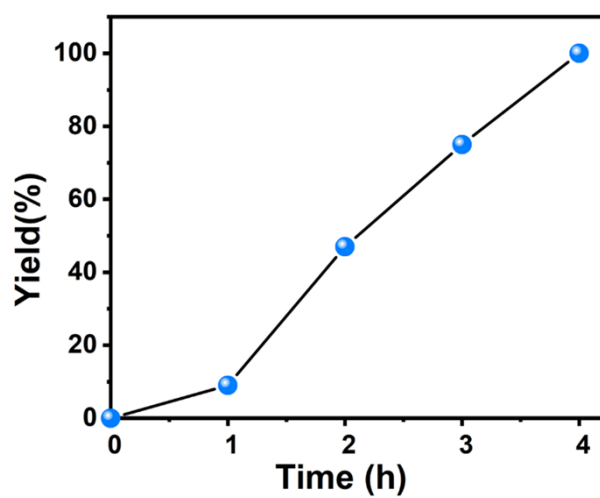

Figure S5: Yield curves of Cu<sub>8</sub>-1 catalyst as a function of time

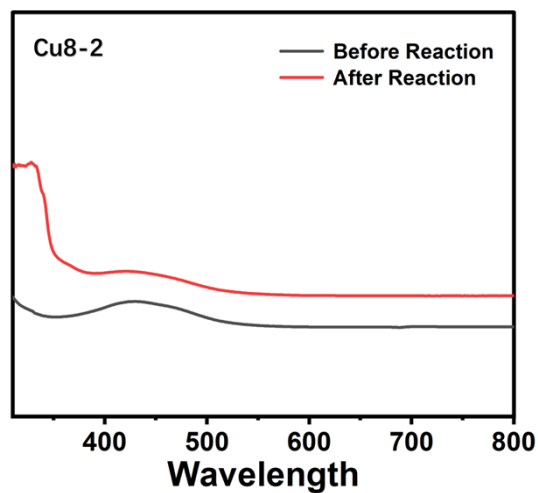

Figure S6: Ultraviolet absorption curves of Cu<sub>8</sub>-2 catalyst before and after reaction

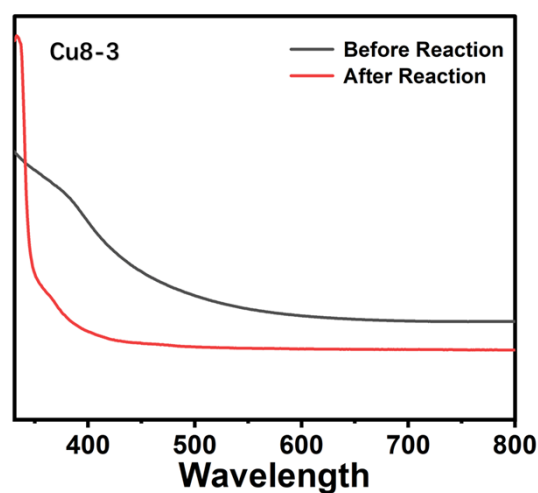

Figure S7: Ultraviolet absorption curves of Cu<sub>8</sub>-3 catalyst before and after reaction

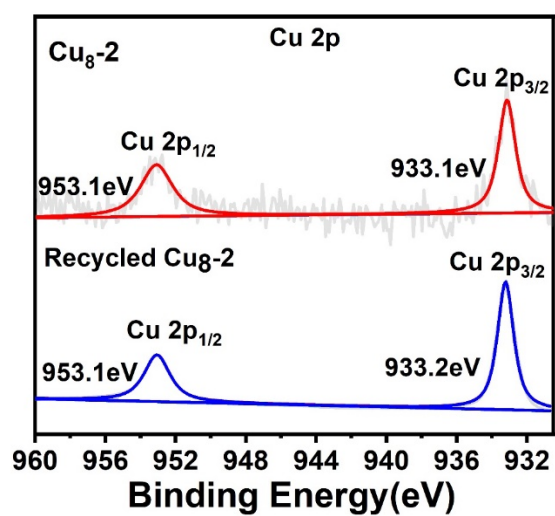

Figure S8: XPS curves before and after Cu<sub>8</sub>-2 catalyst reaction

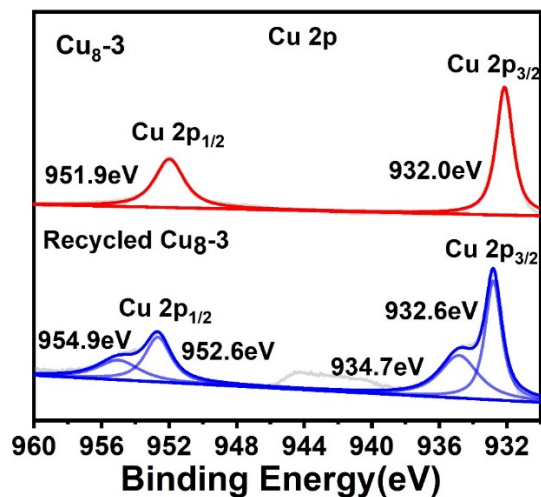

**Figure S9:** XPS curves before and after  $\text{Cu}_8\text{-3}$  catalyst reaction

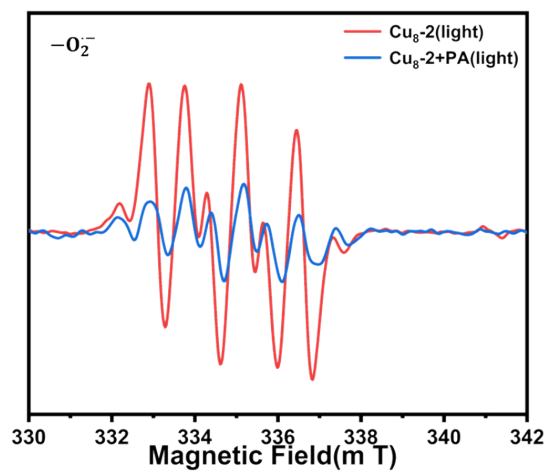

**Figure S10:**  $\text{O}_2^-$  signals of  $\text{Cu}_8\text{-2}$  after light and  $\text{Cu}_8\text{-2}$  after addition of phenylacetylene

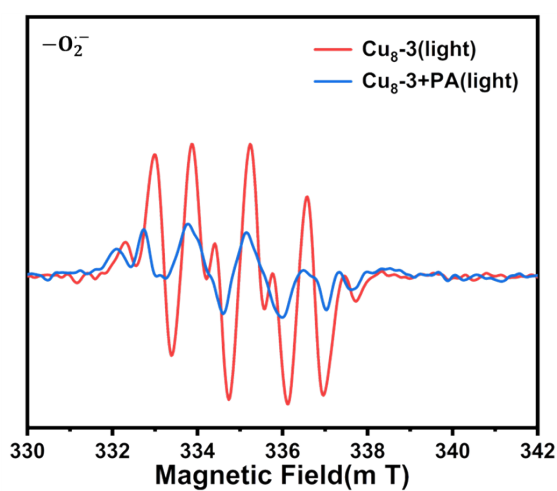

**Figure S11:**  $\text{O}_2^-$  signals of  $\text{Cu}_8\text{-3}$  after light and  $\text{Cu}_8\text{-3}$  after addition of phenylacetylene

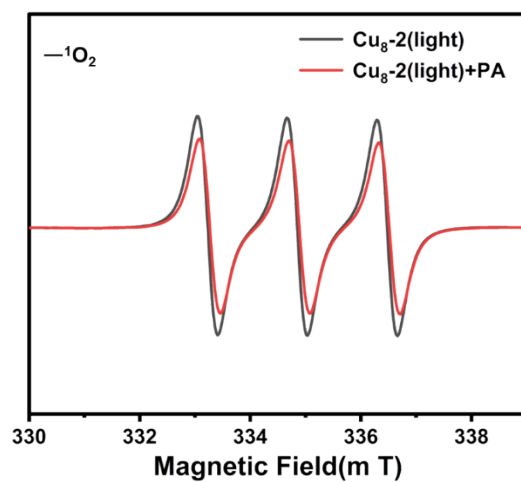

Figure S12:  $^1\text{O}_2$  signals of  $\text{Cu}_8\text{-2}$  after light and  $\text{Cu}_8\text{-2}$  after addition of phenylacetylene

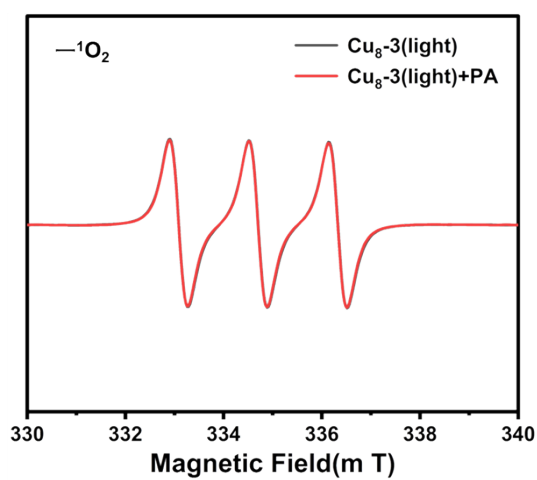

Figure S13:  $^1\text{O}_2$  signals of  $\text{Cu}_8\text{-3}$  after light and  $\text{Cu}_8\text{-3}$  after addition of phenylacetylene

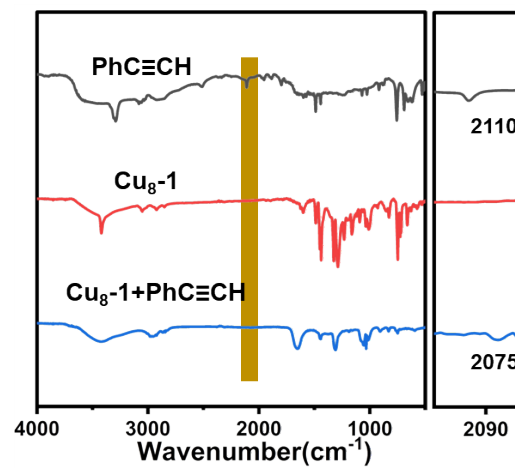

Figure S14: FT-IR spectrum of  $\text{Cu}_8\text{-1}$ , Phenylacetylene and  $\text{Cu}_8\text{-1}$  mixed with Phenylacetylene

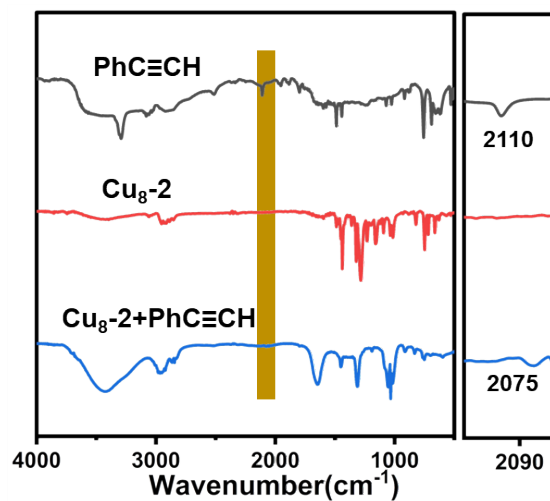

Figure S15: FT-IR spectrum of Cu<sub>8</sub>-2, Phenylacetylene and Cu<sub>8</sub>-2 mixed with Phenylacetylene

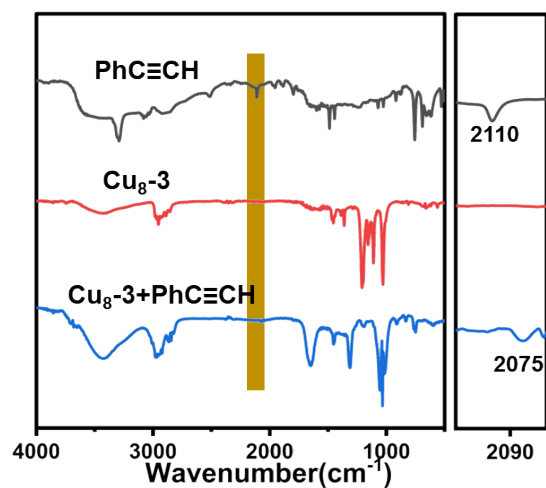

Figure S16: FT-IR spectrum of Cu<sub>8</sub>-3, Phenylacetylene and Cu<sub>8</sub>-3 mixed with Phenylacetylene

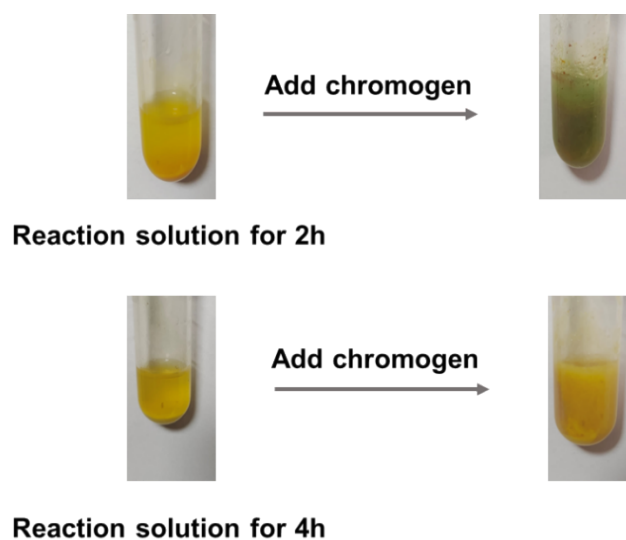

Figure S17: Color development of H<sub>2</sub>O<sub>2</sub>



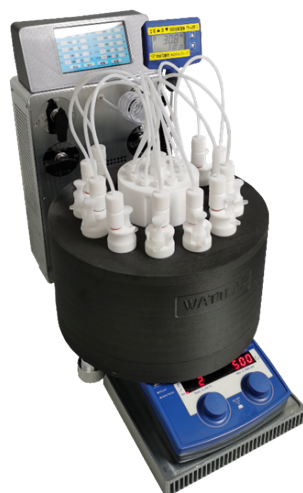

**Figure S18:** The picture of photocatalytic reactor. The photocatalytic reaction was performed on WATTCAS Parallel Photocatalytic Reactor (WP-TEC-LC) with 10W COB LED.

**Table S1 Effect of different catalysts on the activity of photocatalytic phenylene coupling reaction**

| Cat.                             | Condition                                    | TON   | Ref.      |
|----------------------------------|----------------------------------------------|-------|-----------|
| Cu-Cu <sub>2</sub> O-C           | 1 atm CO <sub>2</sub> , rt, 20h, white light | 3.0   | 1         |
| CuSA/ZIF                         | rt, 425nm, 100min                            | 580.6 | 2         |
| Cu/C <sub>3</sub> N <sub>4</sub> | rt., O <sub>2</sub> , 6h                     | 9.9   | 3         |
| CuI                              | O <sub>2</sub> , rt, blue light, 7h          | 19.6  | 4         |
| Cu/MnO <sub>x</sub>              | 25 °C, air, 3h                               | 15.8  | 5         |
| Cu <sub>1</sub> /NC-800          | 100 °C, air, 18 h                            | 26.1  | 6         |
| Cu <sub>8</sub> -1               | 2mg, 4h, rt, 425nm                           | 524.0 | This work |

## References.

1. J. Cai, Y. Li, M. Zhang and Z. Li, *Inorg. Chem.*, 2019, **58**, 7997-8002.
2. Y. Yun, H. Zeng, L. Li, H. Li, , *Adv. Mater.*, 2023, **35**, e2209561.
3. H. Xu, K. Wu, J. Tian, L. Zhu and X. Yao, *Green Chem.*, 2018, **20**, 793-797.
4. Sagadevan, V. P. Charpe and K. C. Hwang, *Catal. Sci. Technol.*, 2016, **6**, 7688-7692.
5. Toledo, I. Funes-Ardoiz, F. Maseras and A. C. Albéniz, *ACS Catal.*, 2018, **8**, 7495-7506.
6. P. Ren, Q. Li, T. Song and Y. Yang, *ACS Appl. Mater. Interfaces*, 2020, **12**, 27210-27218.
